# Supplementary material for: Modelling the Fate of Mercury Emissions from Artisanal and Small Scale Gold Mining
Source: Copernicus journal article supplement (doi:10.5194/egusphere-2024-861), 2024-04-03
Supplement: Supplementary file 1 [file egusphere-2024-861-supplement.pdf]

# Supplementary Information for Modelling the Fate of Mercury Emissions from Artisanal and Small Scale Gold Mining

Ian M. Hedegcock, Francesco De Simone, Francesco Carbone, and Nicola Pirrone

CNR-Institute of Atmospheric Pollution Research, 87036 Rende, Italy

**Correspondence:** Ian M. Hedegcock (ian.hedegcock@iia.cnr.it)

## S1 Emission domain relief

**Figure S1.** Emissions and relief of the South-East Asian Domains, emissions in  $\text{mol km}^{-2} \text{hr}^{-1}$

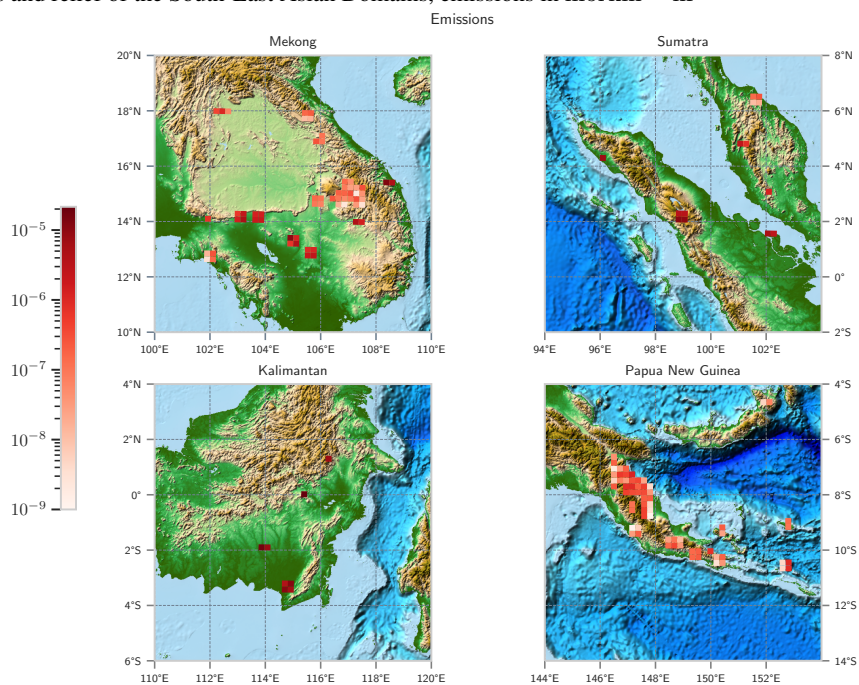

**Figure S2.** Emissions and relief of the African Domains, emissions in  $\text{mol km}^{-2} \text{hr}^{-1}$

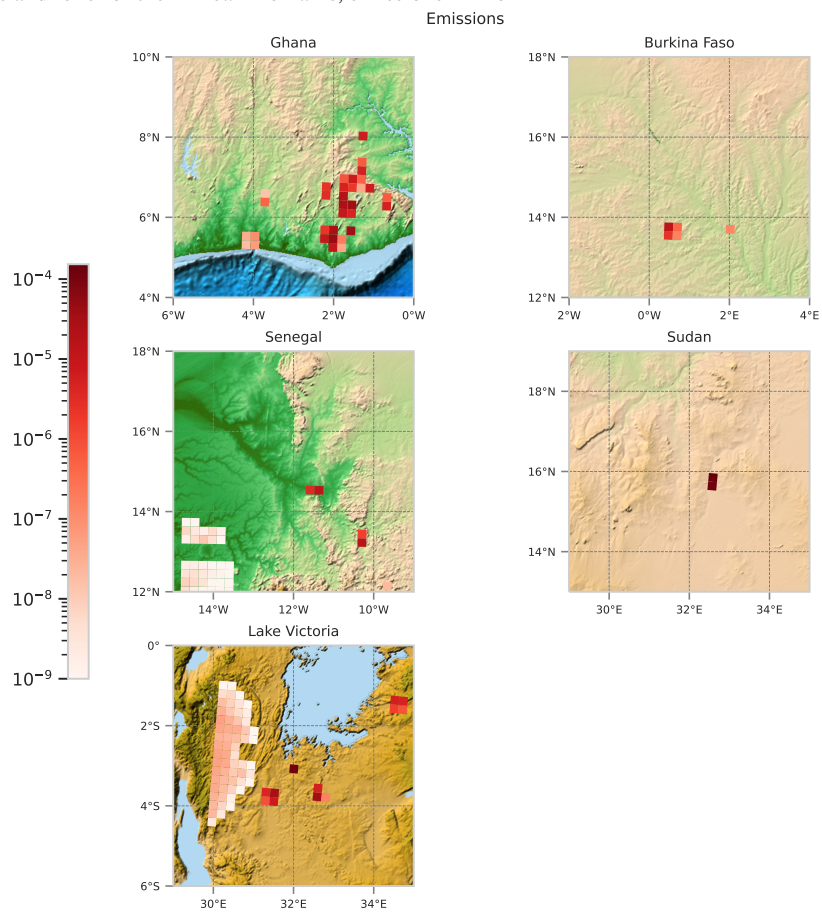

## S2 Land-Sea Deposition Distance plots

**Figure S3.** Normalised Hg Deposition vs. distance from emission source for the South American domains. The left colour bar represents deposition to land, the right to seas and oceans

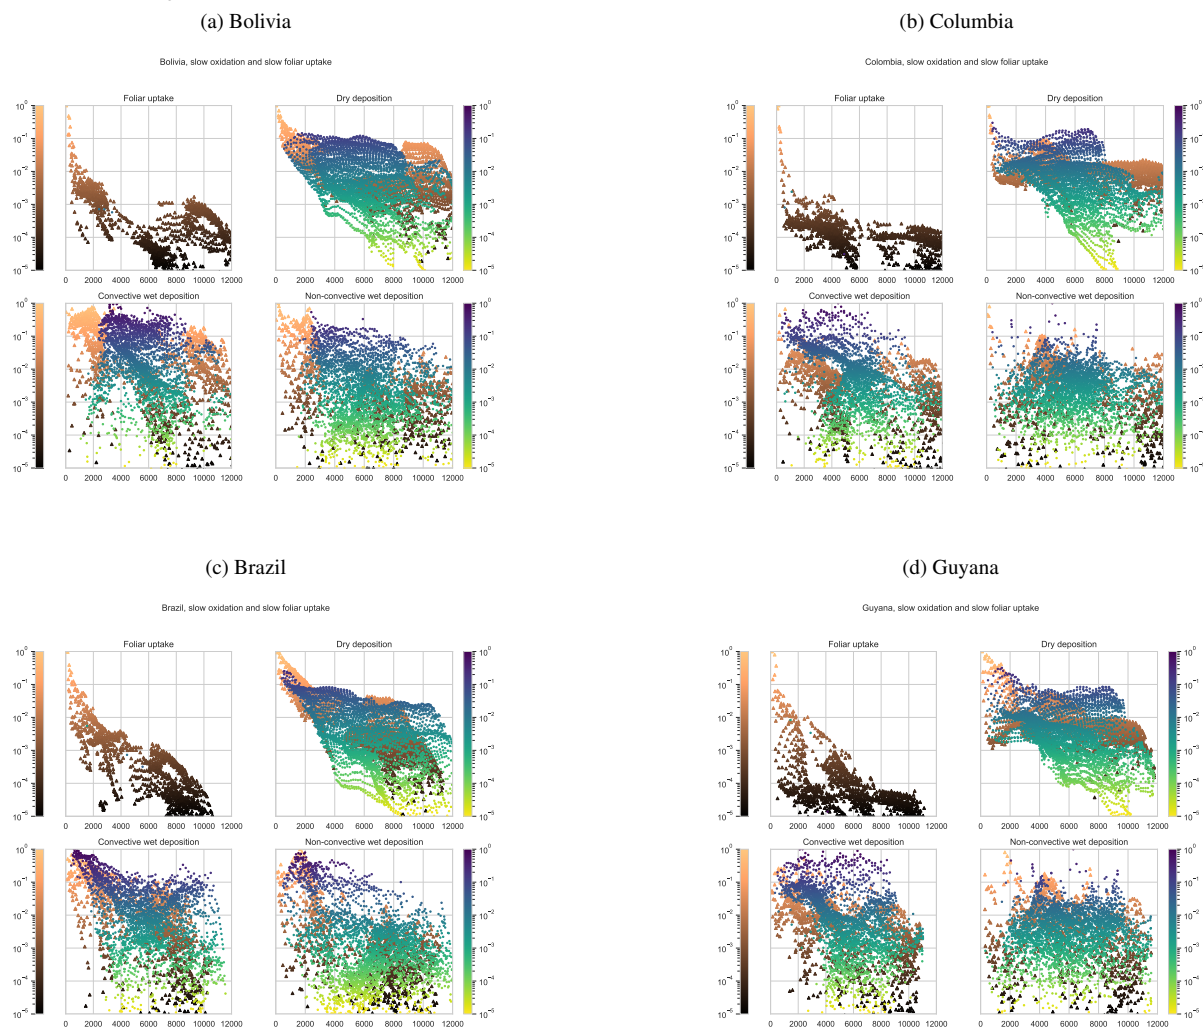

**Figure S4.** Normalised Hg Deposition vs. distance from emission source for the South-East Asian domains. The left colour bar represents deposition to land, the right to seas and oceans

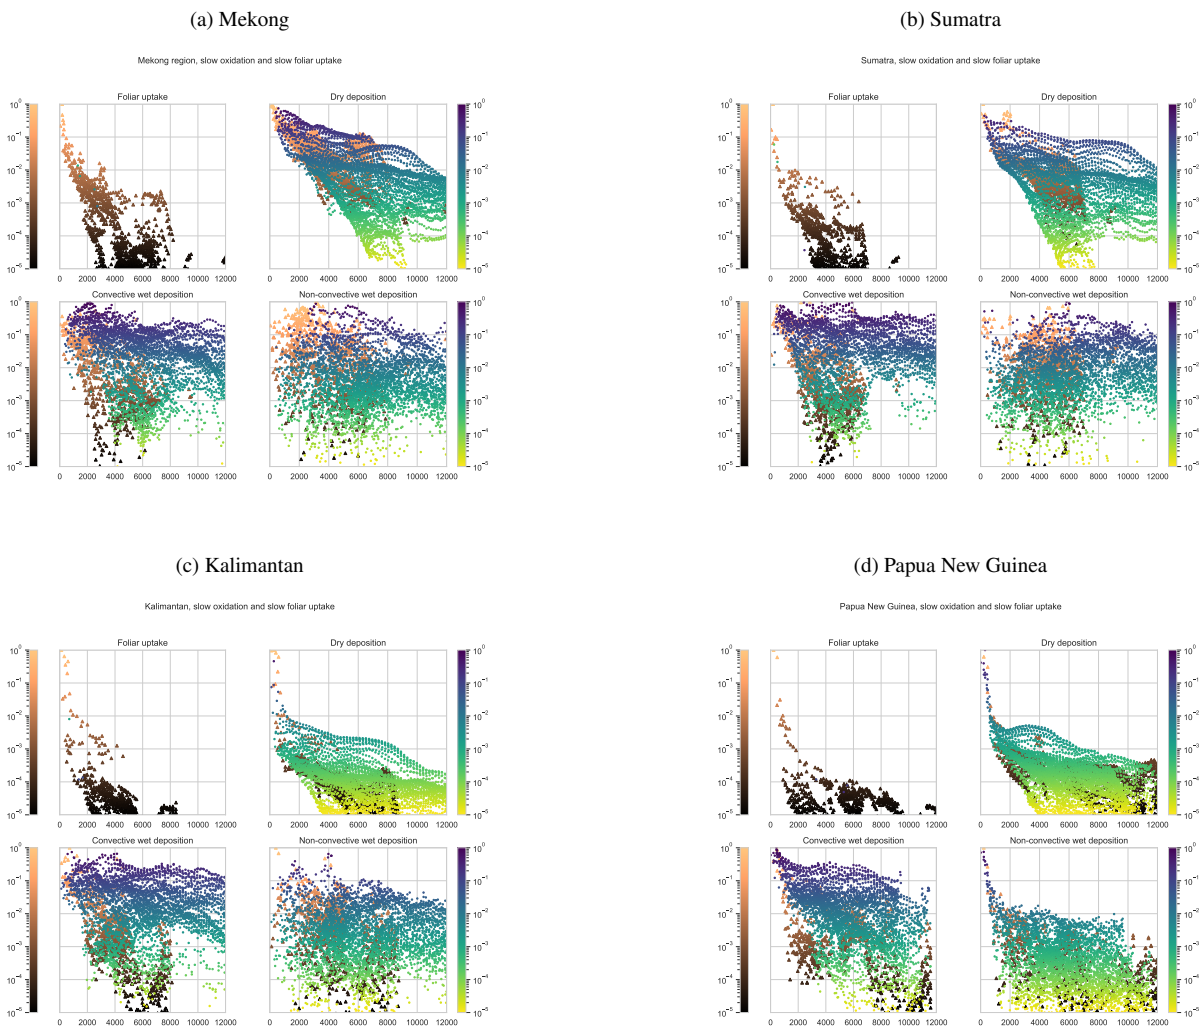

**Figure S5.** Normalised Hg Deposition vs. distance from emission source for the African domains. The left colour bar represents deposition to land, the right to seas and oceans

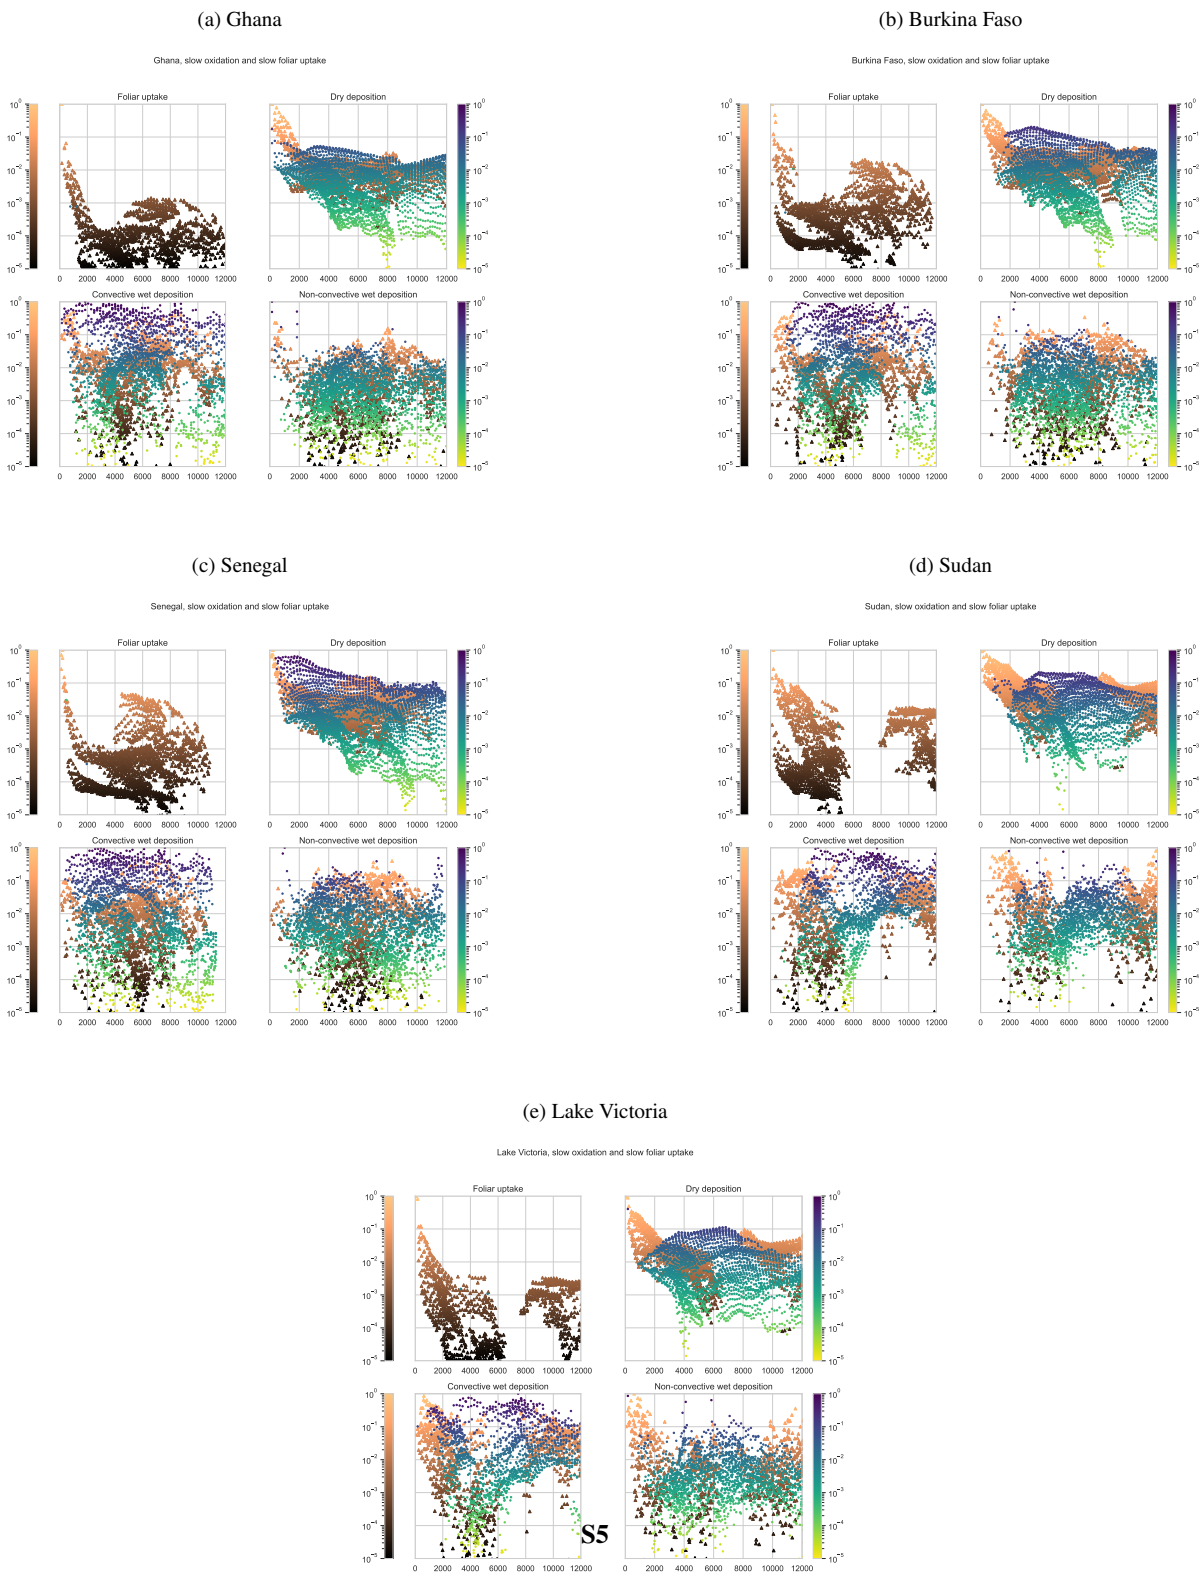

### **S3 Deposition Distance Barcharts**

Note on deposition velocity

**Figure S6.** Deposition vs. distance, South-East Asian emission domains. Percentages of the total within domain deposition

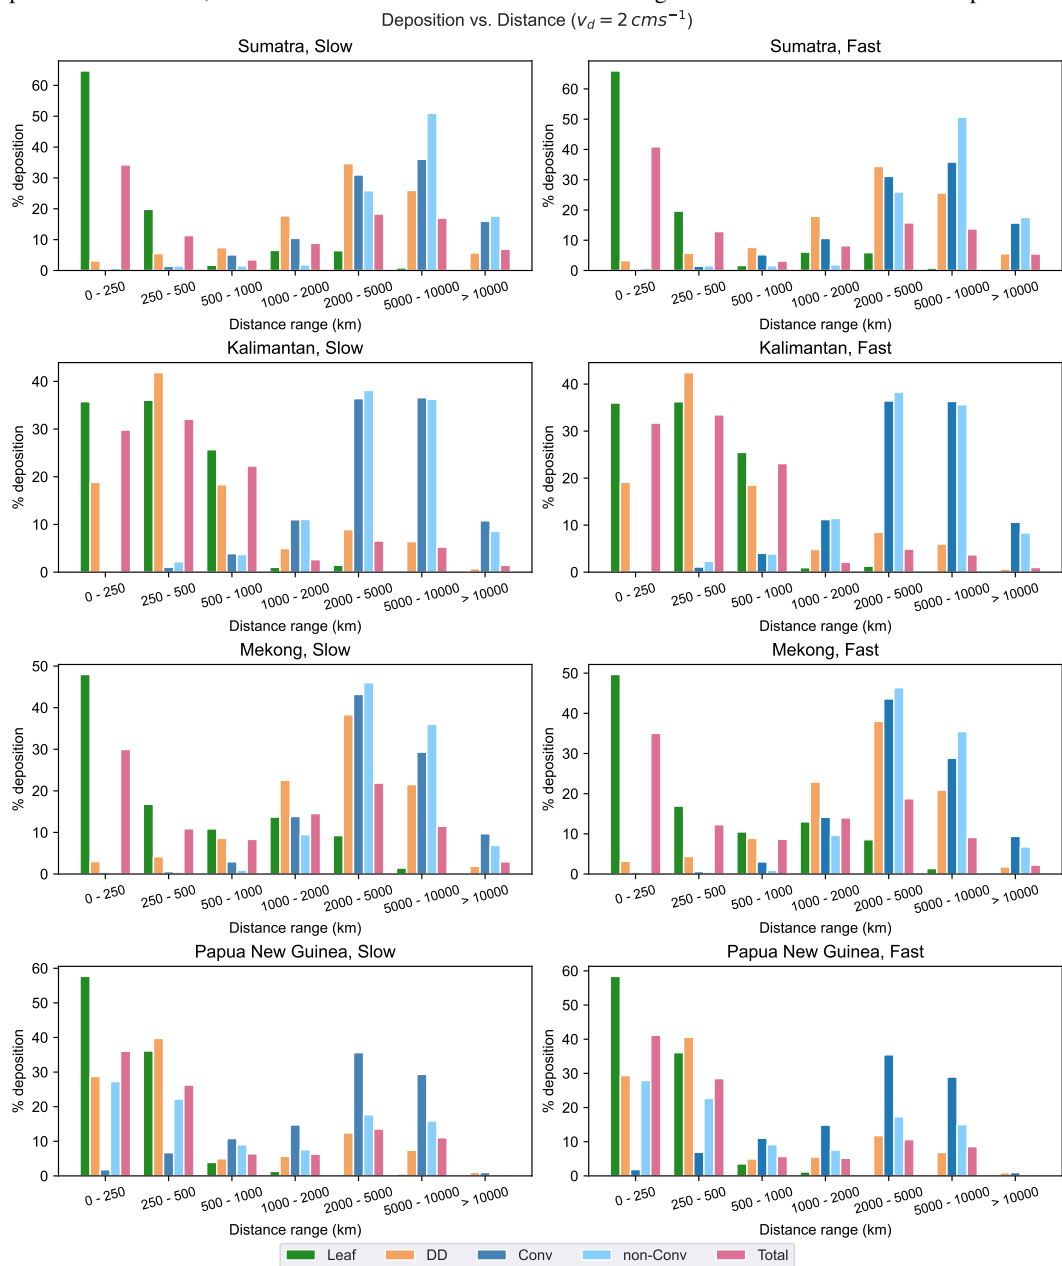

**Figure S7.** Deposition vs. distance, South-East Asian emission domains. Percentages of the total within domain deposition

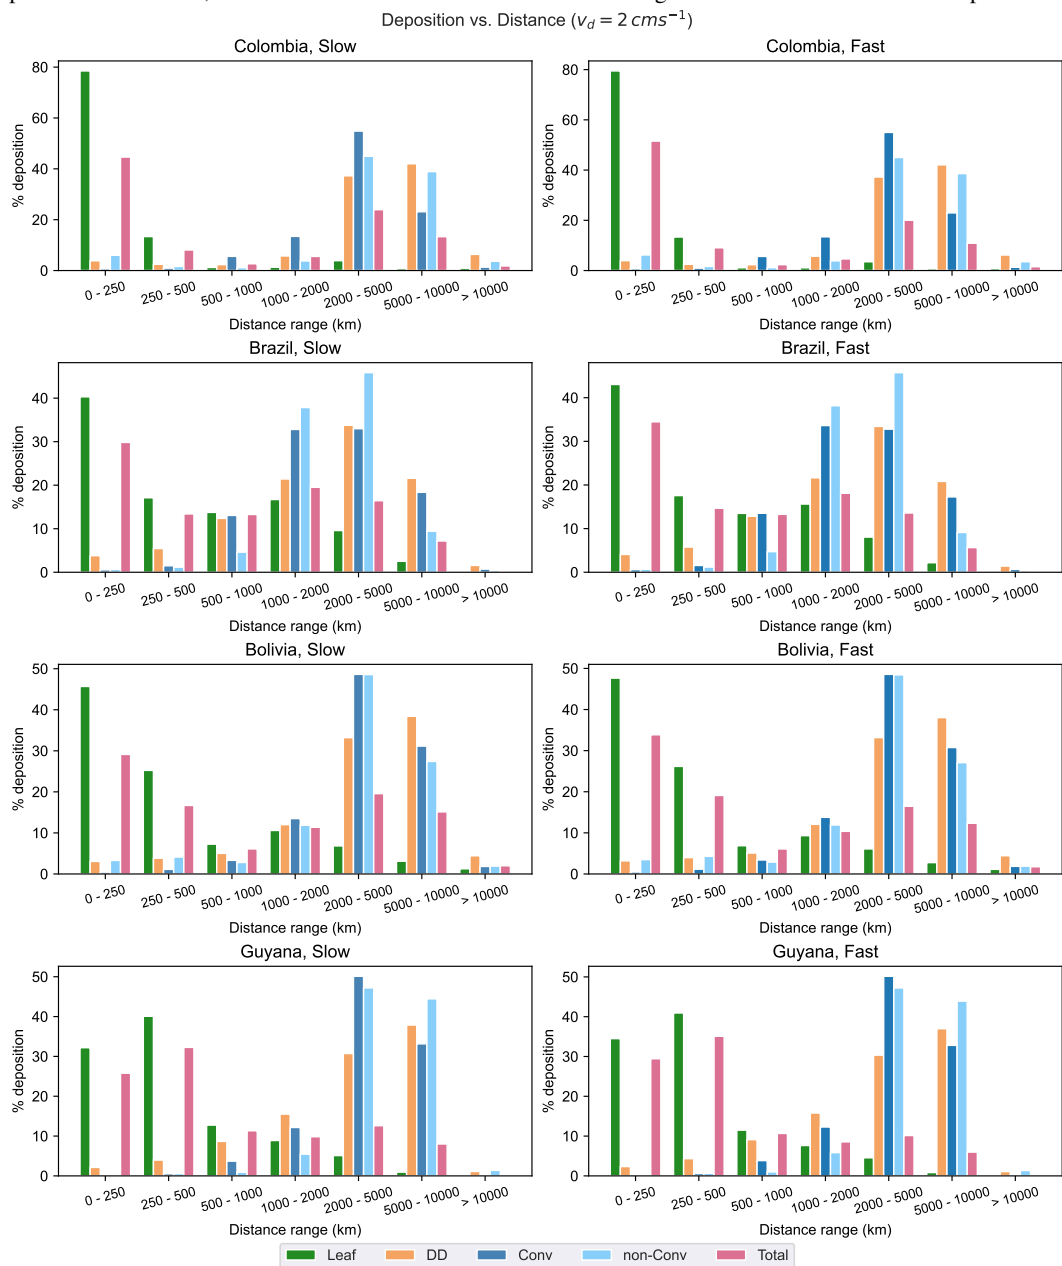



**Figure S8.** Deposition vs. distance, African emission domains. Percentages of the total within domain deposition

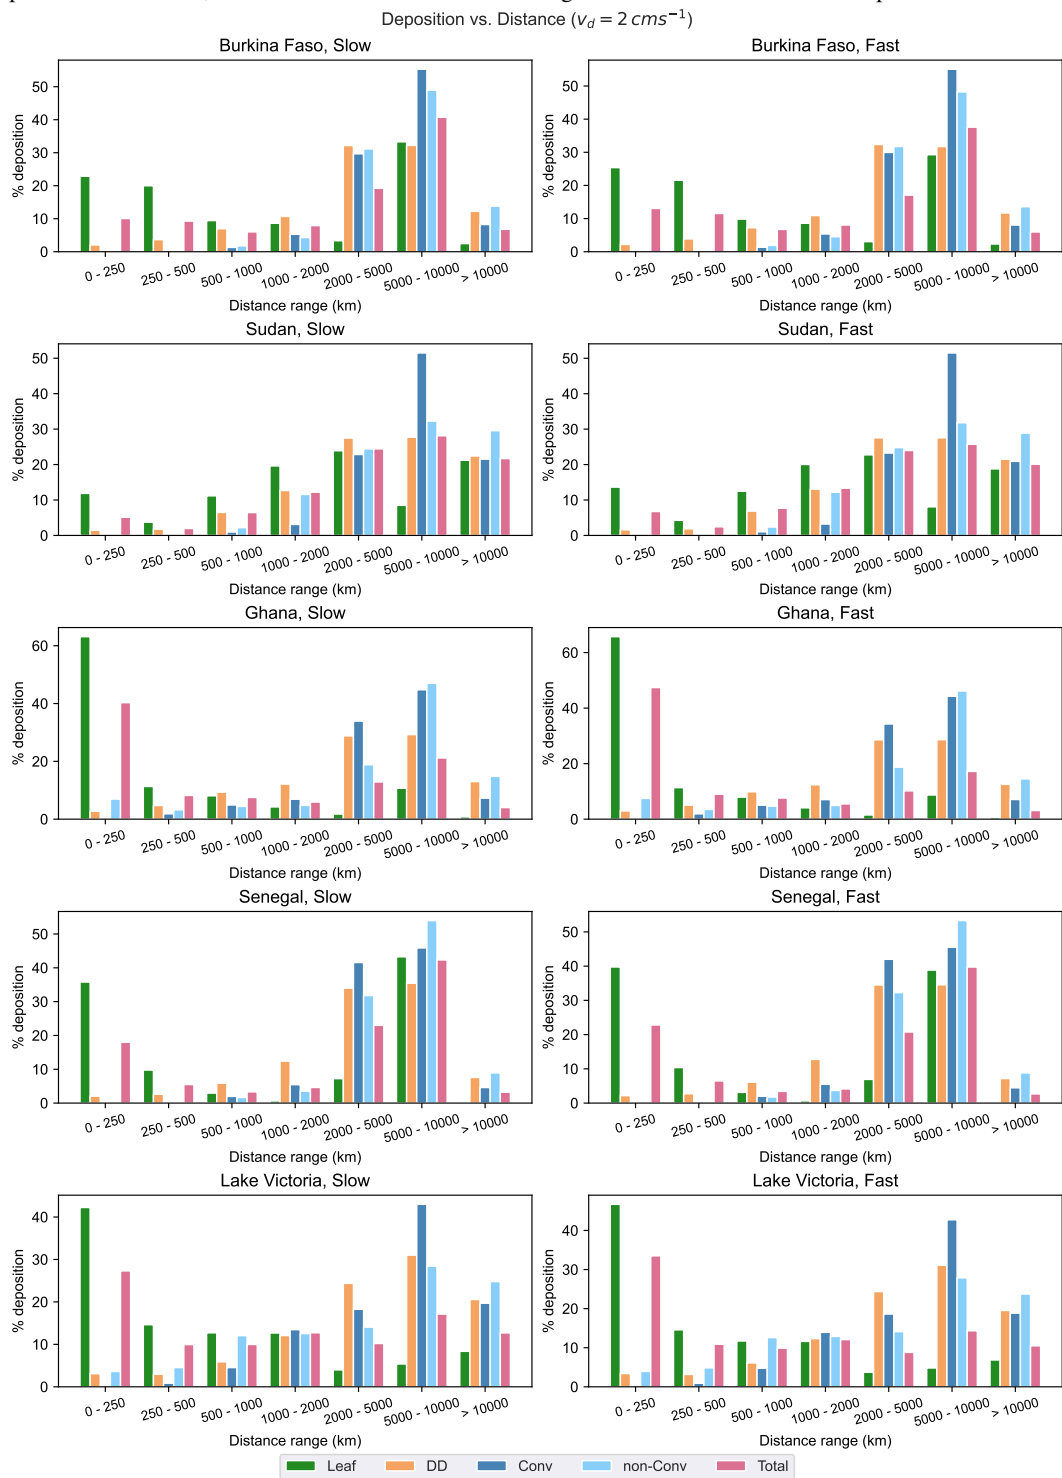

## 5 S4 Deposition Maps

These maps show the deposition from the simulations using the most rapid oxidation rate and the fastest foliar uptake, illustrating the differences in deposition fields for the different domains and different deposition pathways. The normalisation is to the maximum deposition for each pathway for each domain.

**Figure S9.** Normalised deposition from the domain in the Mekong region

Mekong River Domain, fast oxidation, rapid foliar uptake

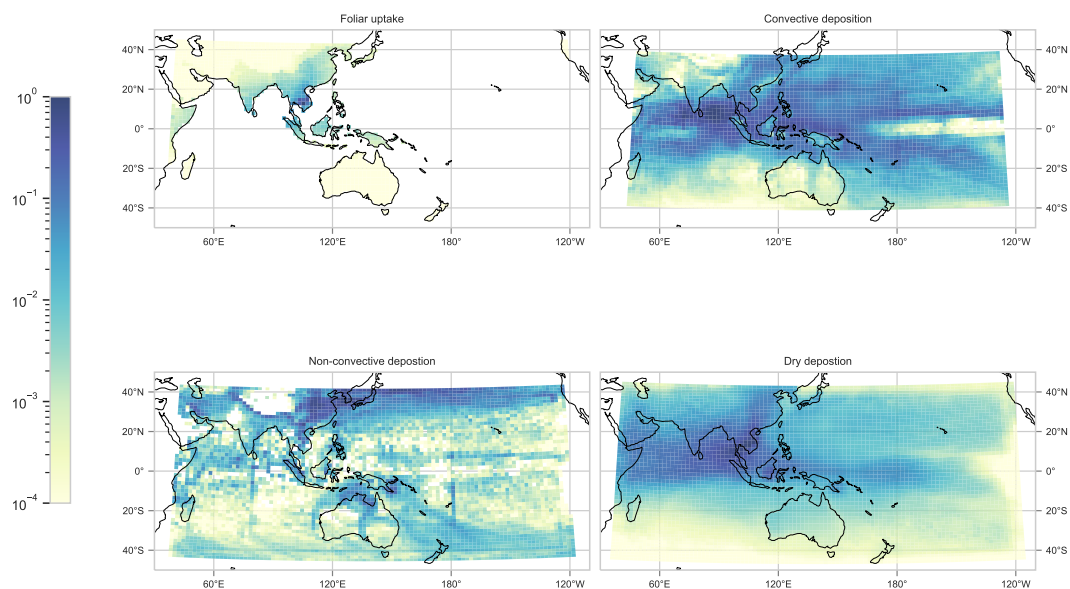

**Figure S10.** Normalised deposition from the domain in Sumatra

Sumatra Domain, fast oxidation, rapid foliar uptake

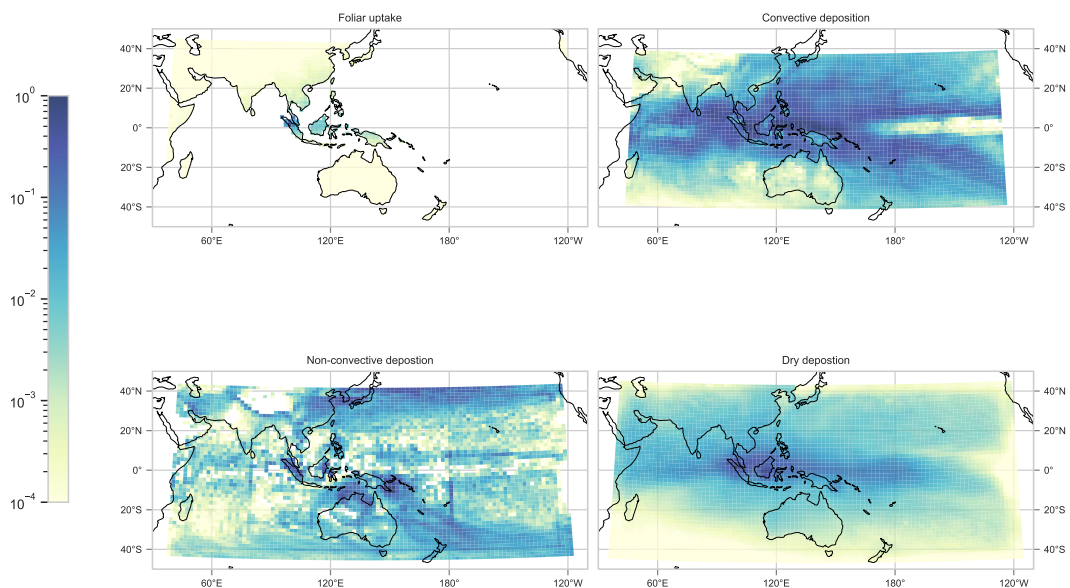

**Figure S11.** Normalised deposition from the domain in Kalimantan

Kalimantan Domain, fast oxidation, rapid foliar uptake

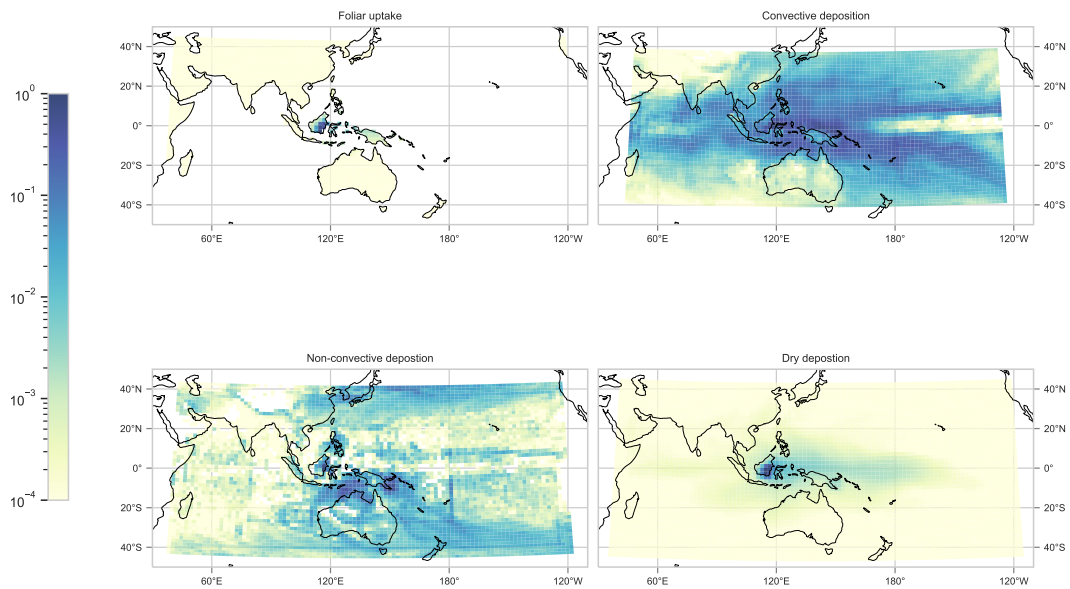

**Figure S12.** Normalised deposition from the domain in Papua New Guinea

Papua New Guinea Domain, fast oxidation, rapid foliar uptake

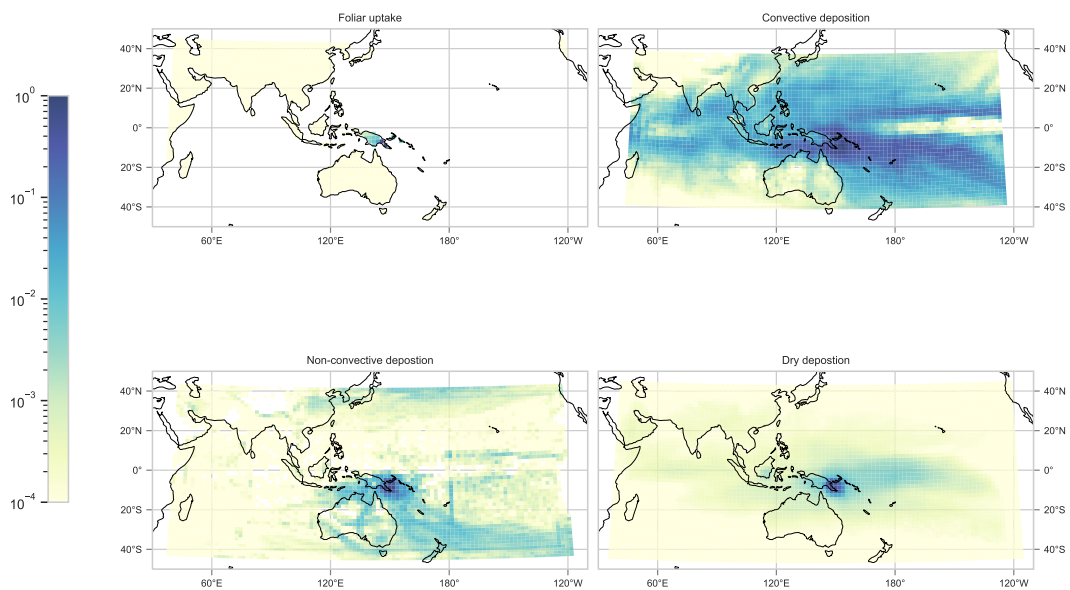

**Figure S13.** Normalised deposition from the domain in Colombia

Colombia Domain, fast oxidation, rapid foliar uptake

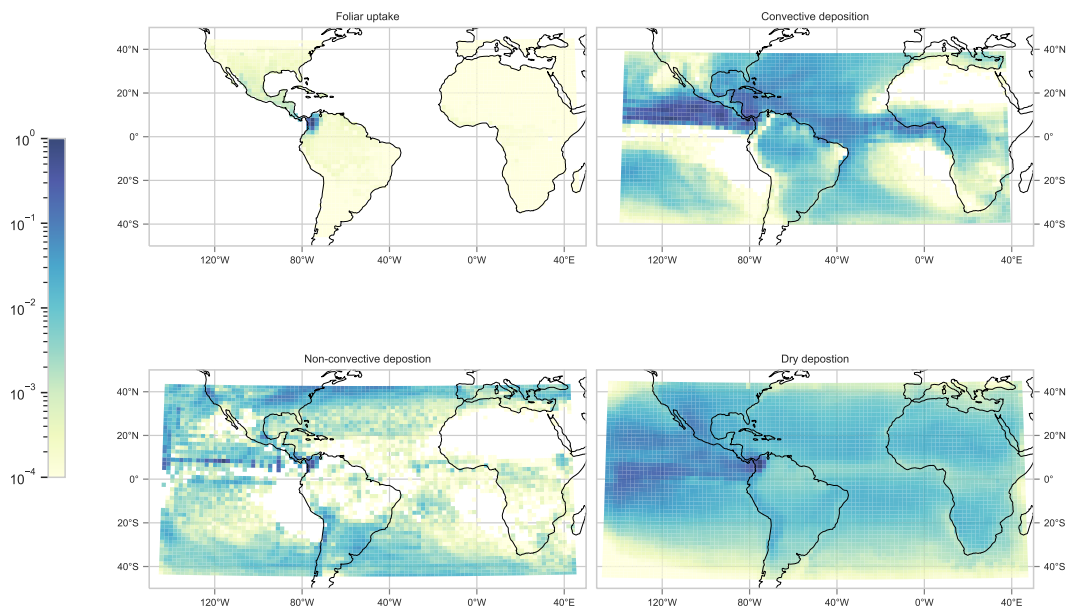

**Figure S14.** Normalised deposition from the domain in Bolivia

Bolivia Domain, fast oxidation, rapid foliar uptake

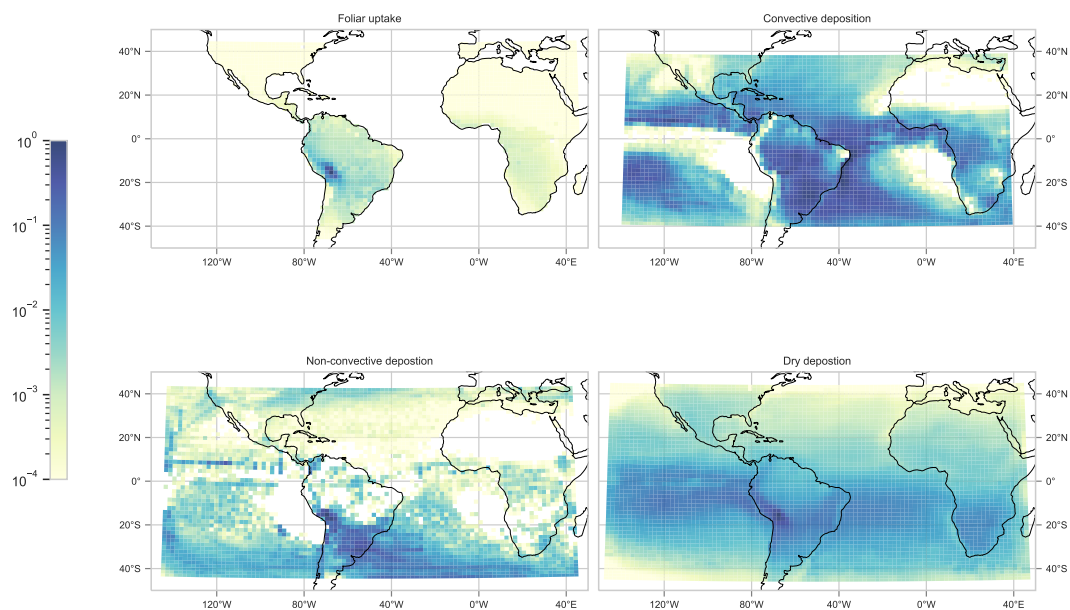

**Figure S15.** Normalised deposition from the domain in Brazil

Brazil Domain, fast oxidation, rapid foliar uptake

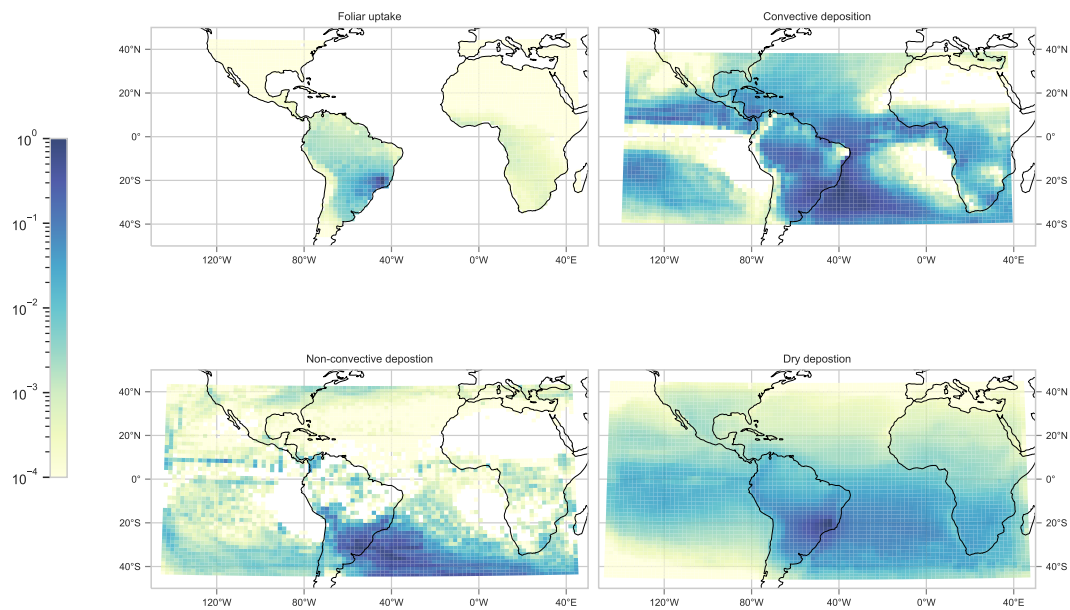

**Figure S16.** Normalised deposition from the domain in Guyana

Guyana Domain, fast oxidation, rapid foliar uptake

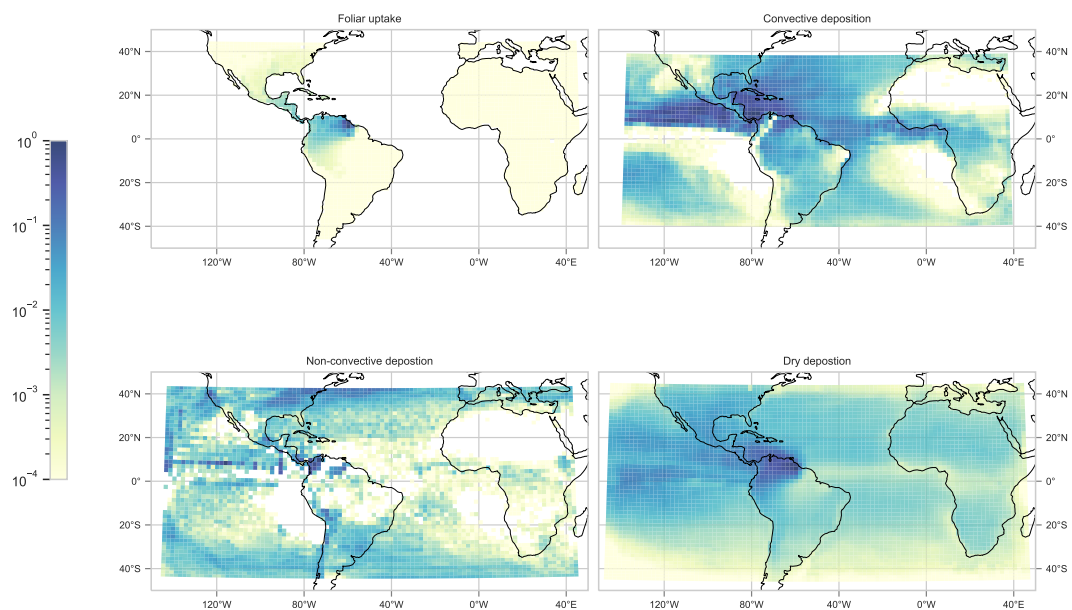

**Figure S17.** Normalised deposition from the domain in Ghana

Ghana Domain, fast oxidation, rapid foliar uptake

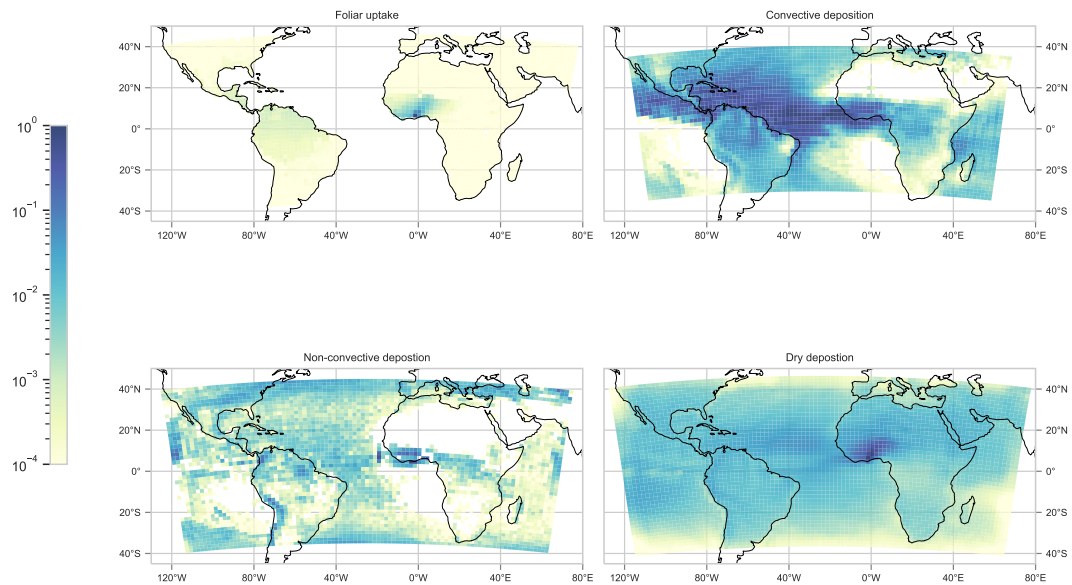

**Figure S18.** Normalised deposition from the domain in Burkina Faso  
Burkina Faso Domain, fast oxidation, rapid foliar uptake

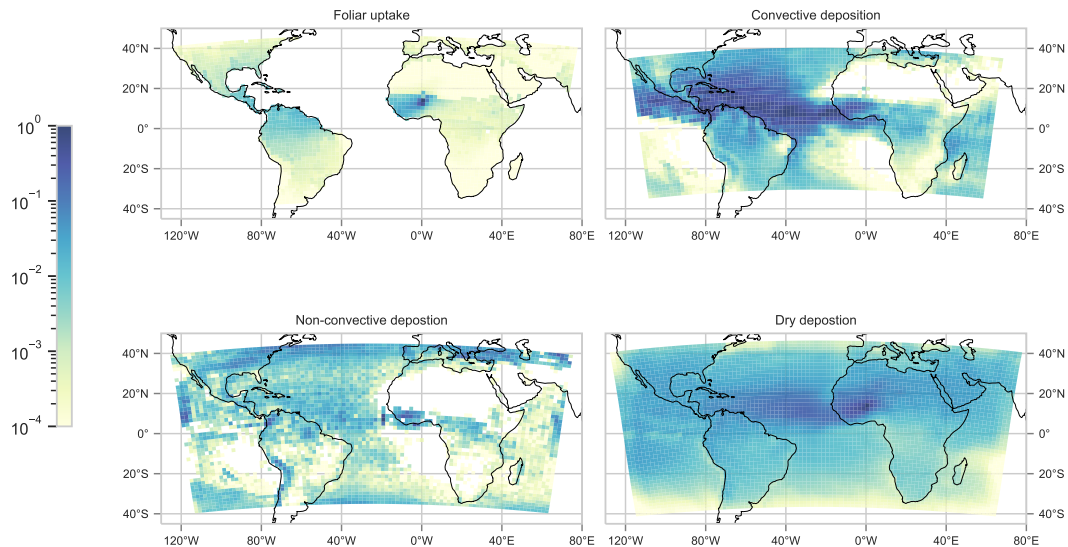

**Figure S19.** Normalised deposition from the domain in Senegal  
Senegal Domain, fast oxidation, rapid foliar uptake

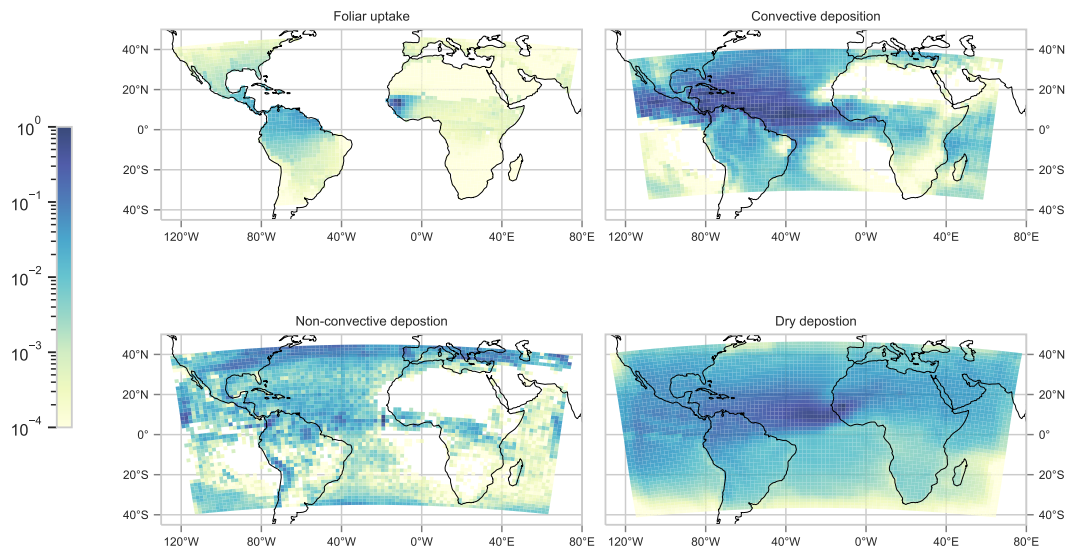

**Figure S20.** Normalised deposition from the domain in Sudan

Sudan Domain, fast oxidation, rapid foliar uptake

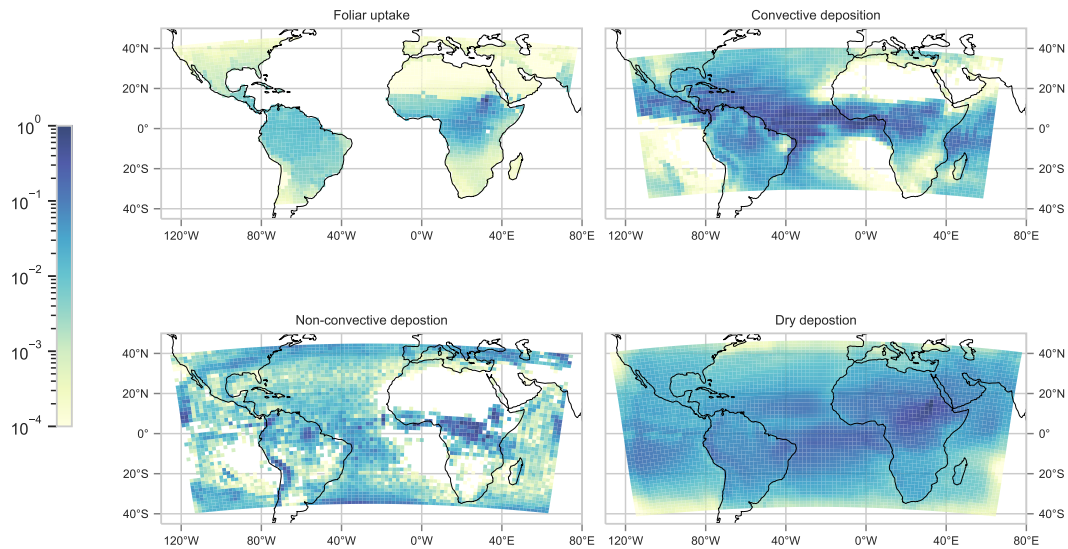

**Figure S21.** Normalised deposition from the domain near Lake Victoria

Lake Victoria Domain, fast oxidation, rapid foliar uptake

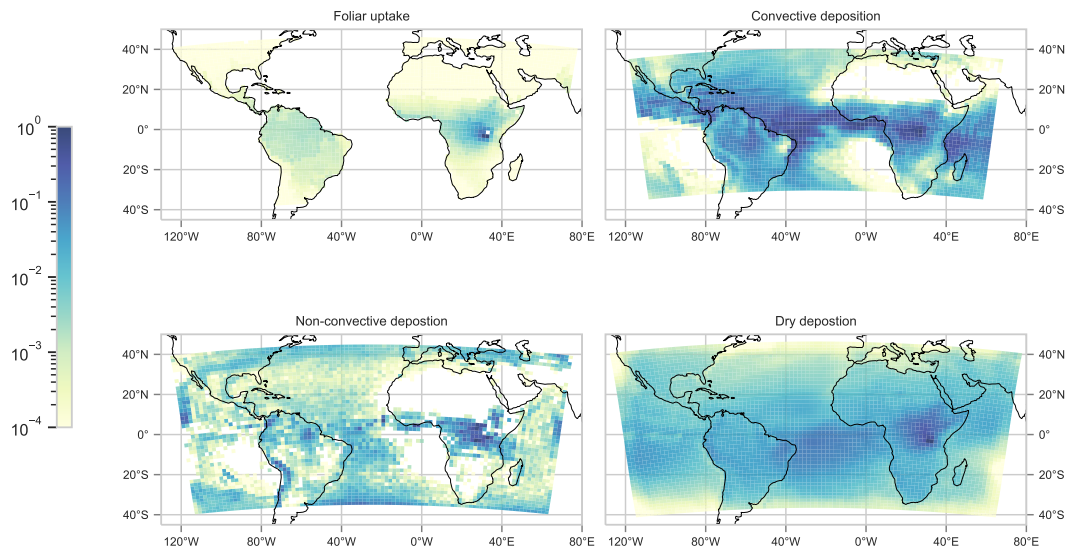



## S5 Vegetation uptake module

```
10 1: MODULE module_veg_uptake
2:
3: USE module_hg_lai_data
4: USE module_state_description
15 5:
6: CONTAINS
7:
8: SUBROUTINE Hg_tracer_ASGM(id , dtstep , ktau , pbl_h , chem , t_phy , p_phy , rho_phy , dz8w , chem_opt , num_chem , &
9:                                z , ht , ids , ide , jds , jde , kds , kde ,                                &
20 10:                                ims , ime , jms , jme , kms , kme ,                                &
11:                                its , ite , jts , jte , kts , kte ,                                &
12:                                lai , raincv_hg , rainncv_hg , Hg_dep , moist , area2d )
13:
14:     IMPLICIT NONE
25 15:
16:     INTEGER,     INTENT(IN  )    :: id
17:     INTEGER,     INTENT(IN  )    :: ktau , chem_opt , num_chem
18:     INTEGER,     INTENT(IN  )    :: ids , ide , jds , jde , kds , kde
19:     INTEGER,     INTENT(IN  )    :: ims , ime , jms , jme , kms , kme
30 20:     INTEGER,     INTENT(IN  )    :: its , ite , jts , jte , kts , kte
21:     REAL,     DIMENSION(ims : ime , kms : kme , jms : jme , num_chem) , INTENT(INOUT) :: chem
22:     REAL,     DIMENSION(ims : ime , 1 , jms : jme , num_Hg_dep) , INTENT(INOUT) :: Hg_dep
23:     REAL,     DIMENSION(ims : ime , kms : kme , jms : jme) , INTENT(IN) :: t_phy , p_phy , rho_phy , dz8w , z
24:     REAL,     DIMENSION(ims : ime , kms : kme , jms : jme , num_moist ) ,           &
35 25:     INTENT(INOUT ) ::                               moist
26:     REAL,     DIMENSION(ims : ime , jms : jme) , INTENT(IN) :: PBL_H , HT , area2d
27:     REAL,     DIMENSION(ims : ime , jms : jme) , INTENT(IN) :: lai , raincv_hg , rainncv_hg
28:     REAL,     INTENT(IN) :: dtstep
29:     !local variables
40 30:     REAL,     DIMENSION(ims : ime , jms : jme) :: fraction_on_ground
31:     REAL           :: colsum_hgii_180_slo_asgm
32:     REAL           :: scav_hgii_180_slo_asgm
33:     REAL           :: fraction_this_cell , frac , mass_deposited_this_lev , lost_fraction
34:     REAL           :: Hg_em_sum , hg_mass , hg_scav_fac , wet_hg_mass , ppm2mgm3
45 35:     REAL           :: LWC , ppm2ngm3 , ng_per_L , ngL_sum , ngL_average , dz8wsum , qr_sum , qr_average
36:     INTEGER        :: count_pbl , count_trop , qr_count
```

```

37:     INTEGER           :: i,j,k
38:
39:
50 40:
41:  !! Uptake by vegetation
42:
43:
44:     do i = its , ite
55 45:     do j = jts , jte
46:         Leaf_lo = lai(i,j)*9.218e-5*dtstep/1.4 !dtstep is in seconds (unlike the chemistry time
47:         Leaf_mid = lai(i,j)*0.0001777*dtstep/1.4
48:         Leaf_hi = lai(i,j)*0.0002632*dtstep/1.4
49:
60 50:         if (Leaf_lo.gt.1.) Leaf_lo = 1.
51:         if (Leaf_mid.gt.1.) Leaf_mid = 1.
52:         if (Leaf_hi.gt.1.) Leaf_hi = 1.
53:
54:         do k = 1,1
65 55:             hg_mass=((200.59 * p_phy(i,1,j)) / (t_phy(i,1,j) * 8.314472)) * 1.e-6 !ppm to mug/m3
56:             Hg_dep(i,1,j,p_hg180_slo_asgm) = Hg_dep(i,1,j,p_hg180_slo_asgm)+hg_mass*chem(i,k,j,p_h
57:
58:             chem(i,k,j,p_hg_180_slo_asgm) = chem(i,k,j,p_hg_180_slo_asgm)*(1. - (Leaf_lo / dz8w(i,1
59:         enddo
70 60:     enddo
61:     enddo
62:
63:
64:  !! Rain
75 65:  !!convective
66:
67:
68: do i = its , ite
69: do j = jts , jte
80 70: if (raincv_hg(i,j).gt.0.1) then
71:     dz8wsum=0.
72:     ppm2ngm3=0.
73:     colsum_hgii_180_slo_asgm=0.
74:     colsum_hgii_270_slo_asgm=0.

```

```

85 75:         colsum_hgii_360_slo_asgm=0.
76:         colsum_hgii_180_110cfpp=0.
77:         colsum_hgii_270_110cfpp=0.
78:         colsum_hgii_360_110cfpp=0.
79:         colsum_hgii_180_115cfpp=0.
90 80:         colsum_hgii_270_115cfpp=0.
81:         colsum_hgii_360_115cfpp=0.
82:         do k=kts , kte
83:         if (p_phy(i,k,j).gt.18000.) dz8wsum=dz8wsum + dz8w(i,k,j)
84:         enddo
95 85:         do k=kts , kte
86:             if (p_phy(i,k,j).gt.18000..and.dz8wsum.gt.100.) then
87:                 ppm2ngm3 = ((200.59 * p_phy(i,k,j)) / (t_phy(i,k,j) * 8.314472)) * 1000. *1.e-6 !this
88:                 colsum_hgii_180_slo_asgm=colsum_hgii_180_slo_asgm+ppm2ngm3*chem(i,k,j,p_hgii_180_slo_a
89:             else
100 90:             continue
91:             endif
92:         enddo
93:
94:
105 95:         if (colsum_hgii_180_slo_asgm.gt.1.e-13) then
96:             Hg_dep(i,1,j,p_hg180_105cdep_cfpp) = Hg_dep(i,1,j,p_hg180_105cdep_cfpp)+750.*(colsum_hg
97:             scav_hgii_180_slo_asgm=(colsum_hgii_180_slo_asgm-(750.*(colsum_hgii_180_slo_asgm/dz8wsu
98:         else
99:             scav_hgii_180_slo_asgm=1.0
110 100:         endif
101:
102:         do k=kts , kte
103:             if (p_phy(i,k,j).gt.18000..and.dz8wsum.gt.100.) then
104:                 chem(i,k,j,p_hgii_180_slo_asgm) = scav_hgii_180_slo_asgm*chem(i,k,j,p_hgii_180_slo_asg
115 105:             else
106:                 continue
107:             endif
108:         enddo
109:
120 110: else
111:     continue
112: endif

```

```

113: enddo
114: enddo
125 115:
116: ! non-convective
117: do i = its , ite
118: do j = jts , jte
119: if (rainncv_hg(i,j).gt.0.1) then
130 120:         dz8wsum=0.
121:         ppm2ngm3=0.
122:         colsum_hgii_180_slo_asgm=0.
123:         colsum_hgii_270_slo_asgm=0.
124:         colsum_hgii_360_slo_asgm=0.
135 125:         colsum_hgii_180_110cfpp=0.
126:         colsum_hgii_270_110cfpp=0.
127:         colsum_hgii_360_110cfpp=0.
128:         colsum_hgii_180_115cfpp=0.
129:         colsum_hgii_270_115cfpp=0.
140 130:         colsum_hgii_360_115cfpp=0.
131:         do k=kts , kte
132:         if (p_phy(i,k,j).gt.60000.) dz8wsum=dz8wsum + dz8w(i,k,j)
133:         enddo
134:
145 135:         do k=kts , kte
136:             if (p_phy(i,k,j).gt.60000..and.dz8wsum.gt.100.) then
137:                 ppm2ngm3 = ((200.59 * p_phy(i,k,j)) / (t_phy(i,k,j) * 8.314472)) * 1000. * 1.e-6 !this
138:                 colsum_hgii_180_slo_asgm=colsum_hgii_180_slo_asgm+ppm2ngm3*chem(i,k,j,p_hgii_180_slo_
139:                 else
150 140:                 continue
141:             endif
142:         enddo
143:
144:         if (colsum_hgii_180_slo_asgm.gt.1.e-13) then
155 145:             Hg_dep(i,l,j,p_hg180_105ncdep_cfpp) = Hg_dep(i,l,j,p_hg180_105ncdep_cfpp)+750.*(colsum_
146:             scav_hgii_180_slo_asgm=(colsum_hgii_180_slo_asgm-(750.*(colsum_hgii_180_slo_asgm/dz8wsum
147:             else
148:             scav_hgii_180_slo_asgm=1.0
149:             endif
160 150:         do k=kts , kte

```

```

151:         if (p_phy(i,k,j).gt.60000..and.dz8wsum.gt.100.) then
152:             chem(i,k,j,p_hgii_180_slo_asgm) = scav_hgii_180_slo_asgm*chem(i,k,j,p_hgii_180_slo_asgm)
153:
154:             else
165 155:             continue
156:             endif
157:         enddo
158:
159: else
170 160: continue
161: endif
162: enddo
163: enddo
164:
175 165: ! dry_dep
166:
167: do i = its , ite
168: do j = jts , jte
169:         do k=1,1
180 170:         ppm2mgm3 = ((200.59 * p_phy(i,k,j)) / (t_phy(i,k,j) * 8.314472)) * 0.001
171:         Hg_dep(i,l,j,p_hg180_105_dd_cfpp) = Hg_dep(i,l,j,p_hg180_105_dd_cfpp) + ppm2mgm3 * chem(i,k,j,p_hgii_180_slo_asgm)
172:         chem(i,k,j,p_hgii_180_slo_asgm) = chem(i,k,j,p_hgii_180_slo_asgm) * (1.- (0.01 * dtst))
173:         enddo
174:     enddo
185 175: enddo
176:
177:         end subroutine Hg_tracer_ASGM

```

---
